# Supplementary material for: Structure and Photocatalytic Properties of Ni-, Co-, Cu-, and Fe-Doped TiO2 Aerogels
Source: MDPI journal article supplement (doi:10.3390/gels9050357), 2023-04-24
Supplement: s1 [file s1]

## Supplementary Materials

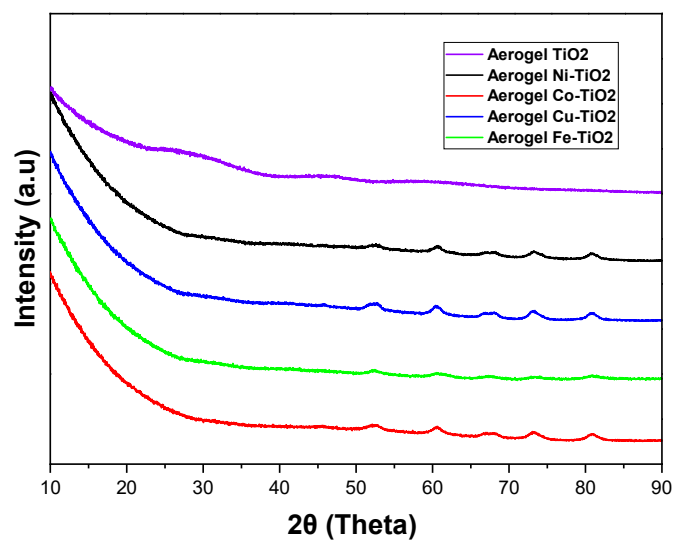

**Figure S1.** XRD spectra of the metal-doped TiO<sub>2</sub> aerogels after supercritical drying process.

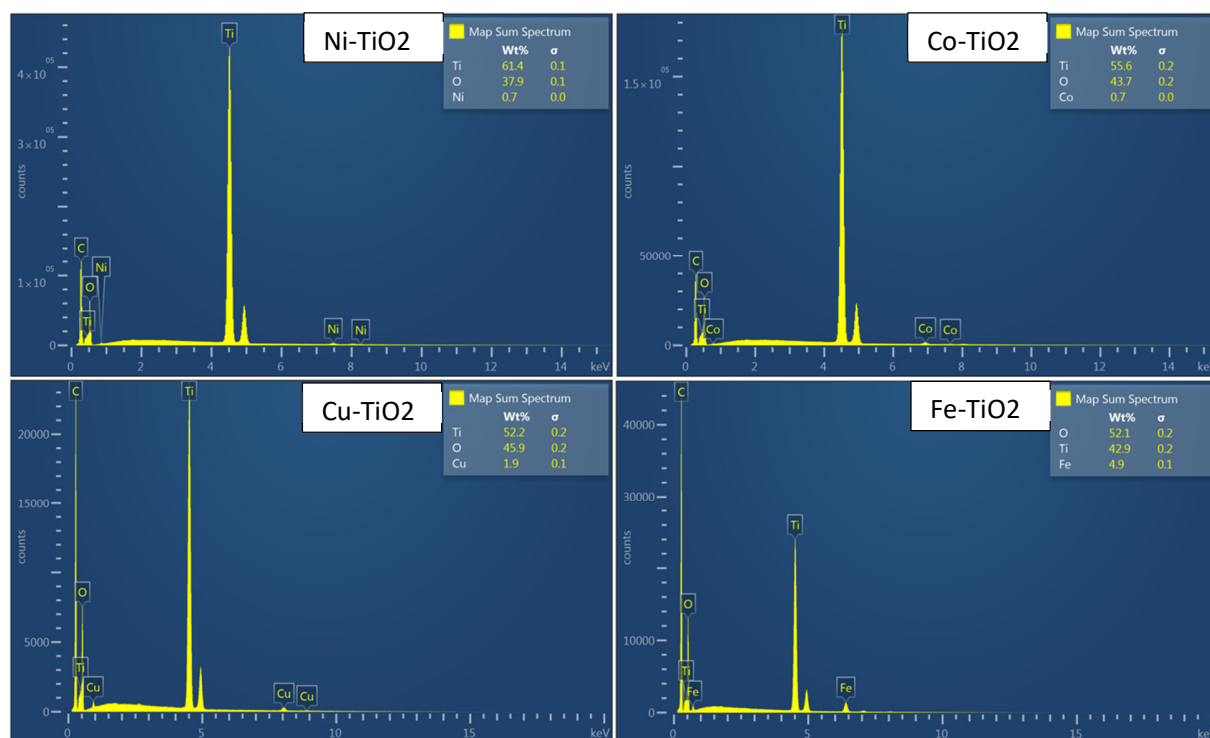

**Figure S2.** EDS spectra of the metal-doped TiO<sub>2</sub> aerogels after calcined at 500 °C.

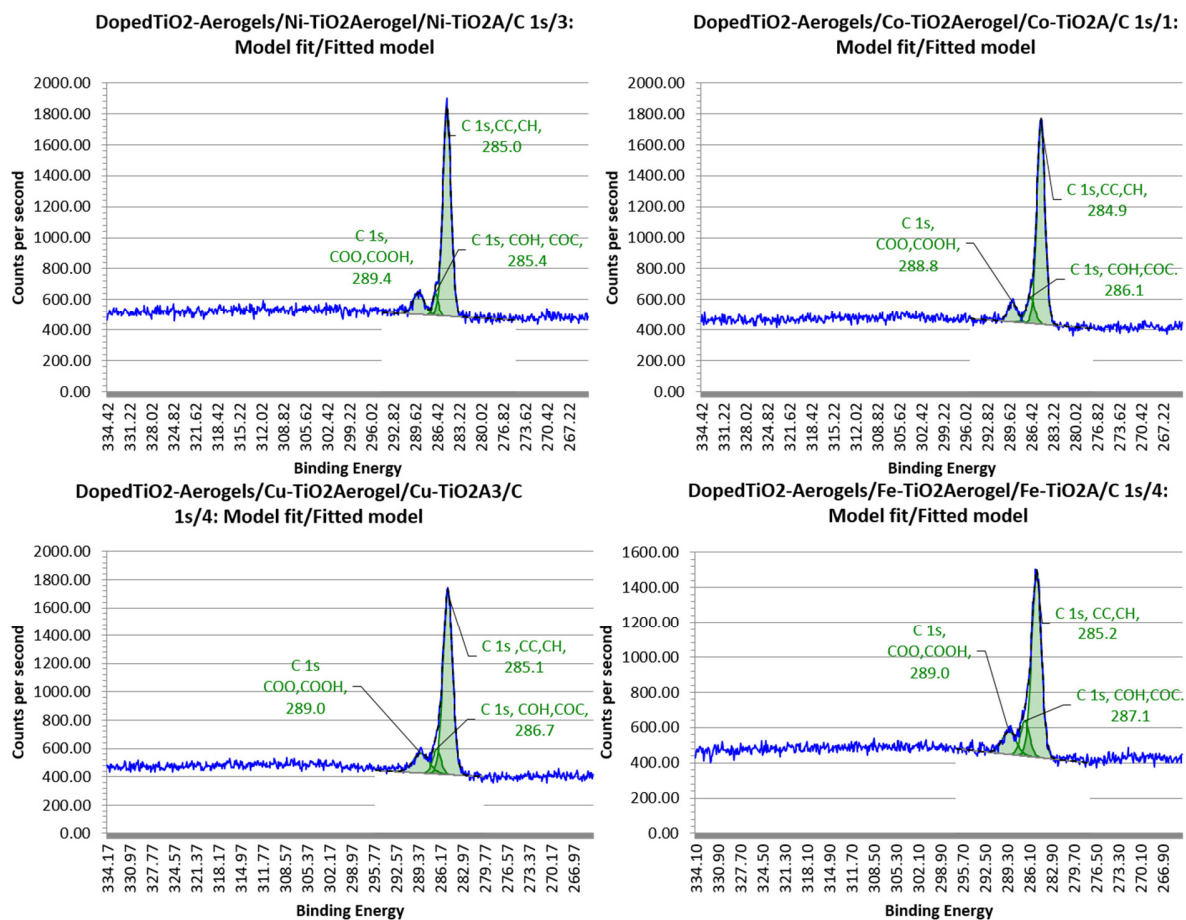

**Figure S3.** Deconvoluted binding energies and atomic concentrations of C 1s obtained from the primary XPS spectra from metal-doped TiO<sub>2</sub> aerogels calcined at 500 °C.

**Table S1.** Chemical quantification from the wide XPS spectra of the metal-doped TiO<sub>2</sub> aerogels.

| <b>Quantification</b>     |         |           |      |                  |           |                |           |
|---------------------------|---------|-----------|------|------------------|-----------|----------------|-----------|
| <b>Ni-TiO<sub>2</sub></b> | BE [eV] | FWHM [eV] | RSF  | Atomic conc. [%] | Error [%] | Mass conc. [%] | Error [%] |
| C 1s 285.5                | 285.09  | 2.42      | 0.28 | 13.02            | 0.96      | 6.45           | 0.51      |
| Ti 2p 459.4               | 464.57  | 2.54      | 2.00 | 8.94             | 0.33      | 17.65          | 0.58      |
| Ti 2p 458.4               | 459.00  | 1.73      | 2.00 | 17.85            | 0.37      | 35.24          | 0.59      |
| O 1s 530.4                | 530.30  | 1.93      | 0.78 | 59.66            | 0.82      | 39.37          | 0.63      |
| Ni 2p 856.4               | 856.34  | 1.50      | 4.04 | 0.16             | 0.09      | 0.39           | 0.21      |
| Ni 2p 861.4               | 862.60  | 4.55      | 4.04 | 0.37             | 0.26      | 0.90           | 0.63      |
| <b>Co-TiO<sub>2</sub></b> | BE [eV] | FWHM [eV] | RSF  | Atomic conc. [%] | Error [%] | Mass conc. [%] | Error [%] |
| C 1s 285.9                | 284.96  | 2.19      | 0.28 | 11.95            | 0.95      | 5.78           | 0.49      |
| Ti 2p 459.2               | 458.87  | 1.78      | 2.00 | 18.54            | 0.39      | 35.76          | 0.62      |
| Ti 2p 464.2               | 464.50  | 2.80      | 2.00 | 9.96             | 0.38      | 19.22          | 0.64      |
| O 1s 530.2                | 530.18  | 1.91      | 0.78 | 59.07            | 0.84      | 38.09          | 0.65      |
| Co 2p 782.2               | 781.93  | 2.38      | 3.59 | 0.29             | 0.17      | 0.69           | 0.41      |
| Co 2p 787.2               | 788.62  | 3.58      | 3.59 | 0.20             | 0.26      | 0.47           | 0.61      |
| <b>Cu-TiO<sub>2</sub></b> | BE [eV] | FWHM [eV] | RSF  | Atomic conc. [%] | Error [%] | Mass conc. [%] | Error [%] |
| C 1s 284.9                | 284.91  | 2.53      | 0.28 | 19.72            | 1.11      | 10.31          | 0.65      |
| Ti 2p 458.9               | 459.48  | 2.53      | 2.00 | 15.15            | 0.43      | 31.58          | 0.72      |
| Ti 2p 459.9               | 465.02  | 3.31      | 2.00 | 7.99             | 0.39      | 16.66          | 0.72      |
| O 1s 530.9                | 531.01  | 3.11      | 0.78 | 56.34            | 1.02      | 39.24          | 0.82      |
| Cu 2p 933.9               | 934.30  | 3.37      | 5.32 | 0.62             | 0.15      | 1.71           | 0.41      |
| Cu 2p 955.9               | 954.46  | 4.66      | 5.32 | 0.18             | 0.20      | 0.50           | 0.56      |
| <b>Fe-TiO<sub>2</sub></b> | BE [eV] | FWHM [eV] | RSF  | Atomic conc. [%] | Error [%] | Mass conc. [%] | Error [%] |
| C 1s 284.3                | 284.42  | 2.44      | 0.28 | 13.89            | 1.12      | 6.95           | 0.61      |
| Ti 2p 458.3               | 458.21  | 2.09      | 2.00 | 15.47            | 0.43      | 30.84          | 0.82      |
| Ti 2p 463.3               | 463.73  | 3.12      | 2.00 | 8.57             | 0.41      | 17.08          | 0.77      |
| O 1s 529.3                | 529.59  | 2.41      | 0.78 | 59.81            | 1.07      | 39.86          | 0.98      |
| Fe 2p 711.3               | 711.54  | 3.37      | 2.96 | 1.09             | 0.33      | 2.53           | 0.76      |
| Fe 2p 724.3               | 724.83  | 6.36      | 2.96 | 1.18             | 0.63      | 2.74           | 1.44      |

**Table S2.** Quantification of deconvoluted binding energies and atomic concentrations of C 1s obtained from the primary XPS spectra from metal-doped TiO<sub>2</sub> aerogels calcined at 500 °C.

**Quantification**

| Ni-TiO <sub>2</sub>   | BE [eV] | FWHM [eV] | RSF  | Atomic conc. [%] | Error [%] | Mass conc. [%] | Error [%] |
|-----------------------|---------|-----------|------|------------------|-----------|----------------|-----------|
| C 1s,CC,CH, 285.0     | 284.97  | 1.38      | 0.28 | 82.08            | 3.76      | 82.08          | 3.76      |
| C 1s, COO,COOH, 289.4 | 289.09  | 1.94      | 0.28 | 12.17            | 3.61      | 12.17          | 3.61      |
| C 1s, COH, COC, 285.4 | 286.62  | 0.88      | 0.28 | 5.75             | 1.84      | 5.75           | 1.84      |
| Quantification        |         |           |      |                  |           |                |           |
| Fe-TiO <sub>2</sub>   | BE [eV] | FWHM [eV] | RSF  | Atomic conc. [%] | Error [%] | Mass conc. [%] | Error [%] |
| C 1s, CC,CH, 285.2    | 285.06  | 1.60      | 0.28 | 73.55            | 4.34      | 73.55          | 4.34      |
| C 1s, COH,COC. 287.1  | 286.71  | 1.52      | 0.28 | 13.16            | 2.93      | 13.16          | 2.93      |
| C 1s, COO,COOH, 289.0 | 288.99  | 2.34      | 0.28 | 13.30            | 4.14      | 13.30          | 4.14      |
| Quantification        |         |           |      |                  |           |                |           |
| Co-TiO <sub>2</sub>   | BE [eV] | FWHM [eV] | RSF  | Atomic conc. [%] | Error [%] | Mass conc. [%] | Error [%] |
| C 1s,CC,CH, 284.9     | 284.98  | 1.35      | 0.28 | 79.93            | 3.64      | 79.93          | 3.64      |
| C 1s, COH,COC. 286.1  | 286.53  | 1.42      | 0.28 | 10.86            | 2.75      | 10.86          | 2.75      |
| C 1s, COO,COOH, 288.8 | 289.12  | 1.57      | 0.28 | 9.21             | 2.99      | 9.21           | 2.99      |
| Quantification        |         |           |      |                  |           |                |           |
| Cu-TiO <sub>2</sub>   | BE [eV] | FWHM [eV] | RSF  | Atomic conc. [%] | Error [%] | Mass conc. [%] | Error [%] |
| C 1s ,CC,CH, 285.1    | 285.08  | 1.58      | 0.28 | 77.13            | 4.19      | 77.13          | 4.19      |
| C 1s, COH,COC, 286.7  | 286.66  | 1.36      | 0.28 | 8.92             | 2.40      | 8.92           | 2.40      |
| C 1s COO,COOH, 289.0  | 288.95  | 2.68      | 0.28 | 13.95            | 4.05      | 13.95          | 4.05      |

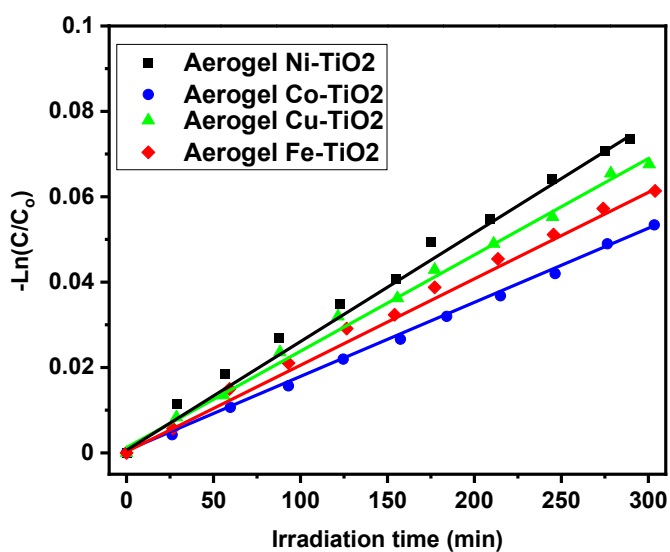

**Figure S4.** Photocatalytic performance of the metal-doped TiO<sub>2</sub> aerogels: Ni, Co, Cu, Fe fitting the kinetic reaction curves  $-\ln(C/C_0) = k_{app}t$ , where  $k_{app}$  refers to the apparent rate of photoactivity for the samples calcined at 900°C.

**Table S3.** STEM-EDS elemental quantification of the Ni, Ti, and O presented in the Ni-TiO<sub>2</sub> aerogel lattice after calcined at 500°C.

| Z  | Element | Family | Atomic Fraction (%) | Atomic Error (%) | Mass Fraction (%) | Mass Error (%) | Fit error (%) |
|----|---------|--------|---------------------|------------------|-------------------|----------------|---------------|
| 8  | O       | K      | 62.85               | 8.08             | 36.07             | 3.04           | 0.79          |
| 22 | Ti      | K      | 36.77               | 6.79             | 63.14             | 9.91           | 0.03          |
| 28 | Ni      | K      | 0.38                | 0.07             | 0.8               | 0.13           | 0.64          |
